# Supplementary material for: Sortilin Expression Levels and Peripheral Immunity: A Potential Biomarker for Segregation between Parkinson’s Disease Patients and Healthy Controls
Source: MDPI journal article supplement (doi:10.3390/ijms25031791), 2024-02-01
Supplement: s1 [file s1]

# Sortilin expression levels and peripheral immunity: A potential biomarker for segregation between Parkinson's Disease Patients and Healthy Controls

Maria Georgoula<sup>1§</sup>, Panagiotis Ntavaroukas<sup>1§</sup>, Anastasia Androutsopoulou<sup>1</sup>, Georgia Xiromerisiou<sup>2</sup>, Fani Kalala<sup>3</sup>, Matthaïos Speletas<sup>3</sup>, Eftihia Asproдини<sup>4</sup>, Anna Vasilaki<sup>5</sup>, and Stamatia Papoutsopoulou<sup>1,\*</sup>

**Supplementary Table 1.** The percentage of CD3<sup>+</sup> T cells, CD19<sup>+</sup> B cells and CD14<sup>+</sup> monocytes in freshly prepared peripheral blood detected by flow cytometry from healthy (H, n=11) and PD donors (PD, n=10).

| Sample ID | CD3 <sup>+</sup> T cells | CD19 <sup>+</sup> B cells | CD14 <sup>+</sup> Monocytes |
|-----------|--------------------------|---------------------------|-----------------------------|
| H1        | 15.6                     | 1.7                       | 3.8                         |
| H2        | 14.2                     | 1.3                       | 3.2                         |
| H3        | 13.1                     | 2.3                       | 2.6                         |
| H4        | 14.8                     | 4.6                       | 1                           |
| H5        | 12.2                     | 3                         | 2.5                         |
| H6        | 14.8                     | 2.2                       | 2.5                         |
| H7        | 20.8                     | 1.9                       | 3.9                         |
| H8        | 13.4                     | 1.5                       | 3.6                         |
| H9        | 13.6                     | 0.4                       | 4.2                         |
| H10       | 11.1                     | 1.1                       | 2.8                         |
| H11       | 23.6                     | 2.2                       | 4.2                         |
|           |                          |                           |                             |
| PD1       | 0.6                      | 0                         | 0                           |
| PD2       | 17.7                     | 0                         | 0.2                         |
| PD3       | 1.7                      | 0                         | 0.3                         |
| PD4       | 13.7                     | 0                         | 0                           |
| PD5       | 3.5                      | 0                         | 0.6                         |
| PD6       | 9.3                      | 1.6                       | 2.3                         |
| PD7       | 28                       | 6.7                       | 3.9                         |
| PD8       | 9.1                      | 1.6                       | 1.1                         |
| PD9       | 14.2                     | 1.4                       | 1.2                         |
| PD10      | 9.1                      | 0.8                       | 2.1                         |

# Analysis of the peripheral blood populations by flow cytometry

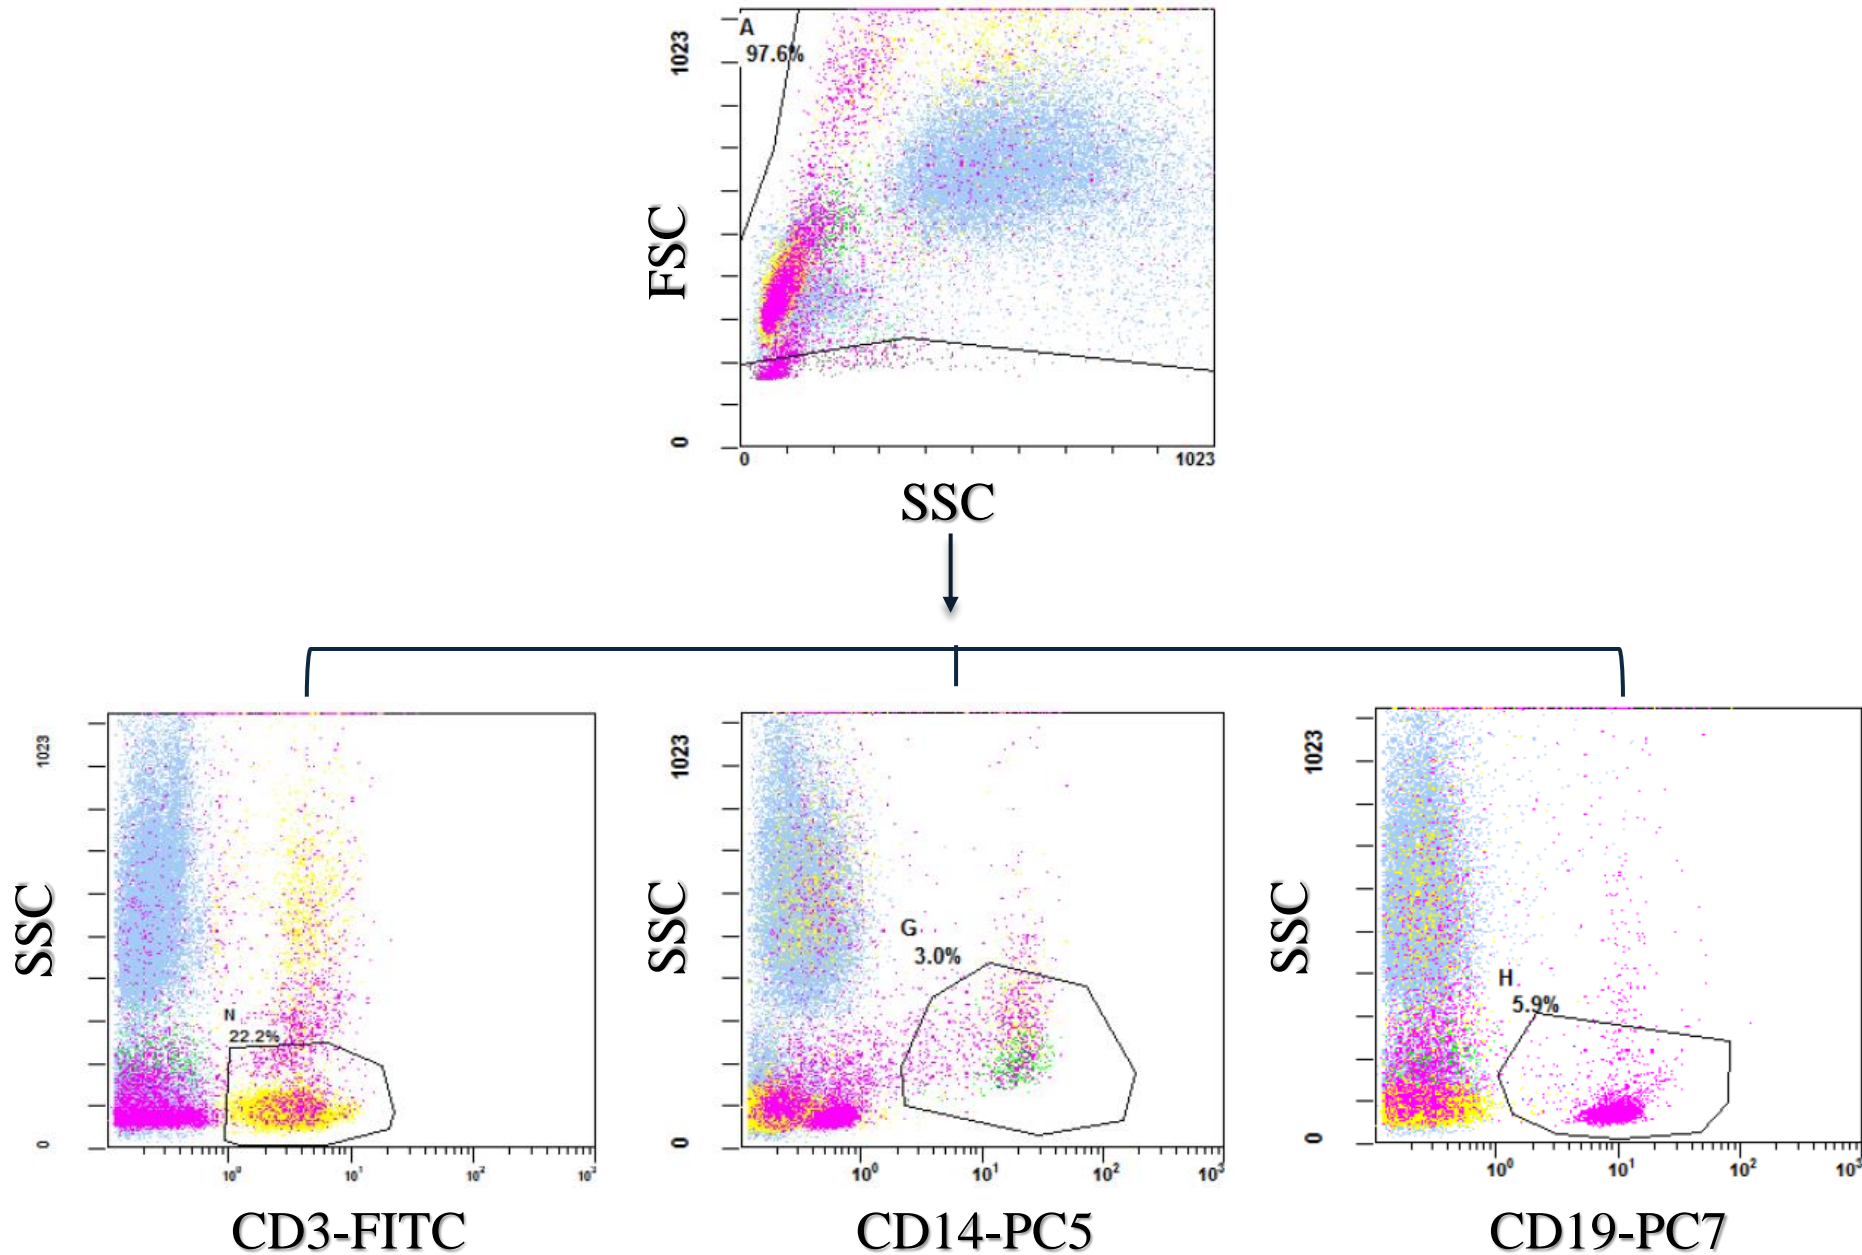

HEALTHY

1

2

3

4

5

6

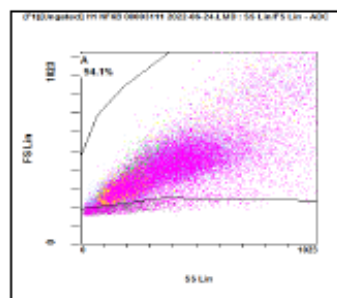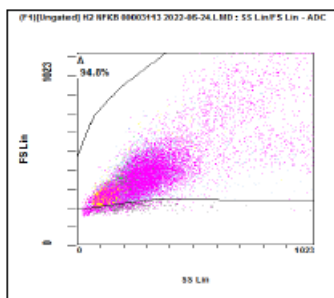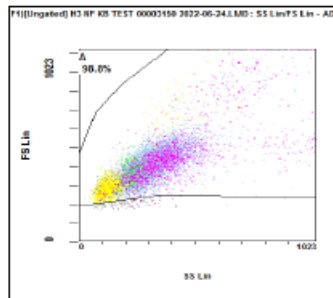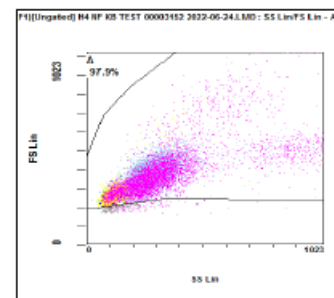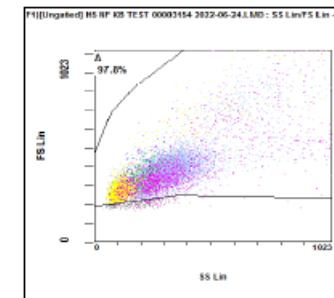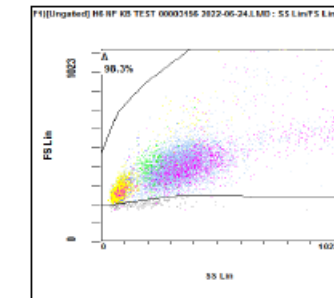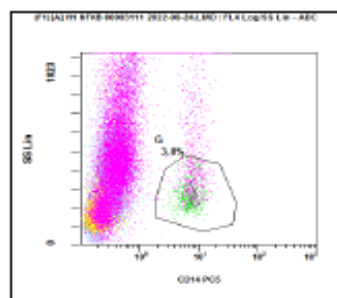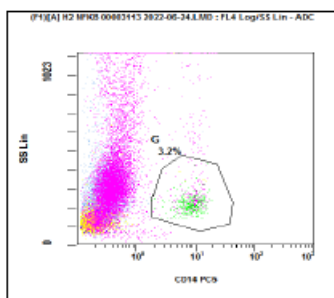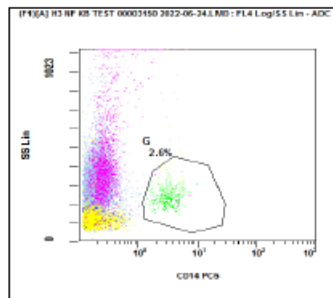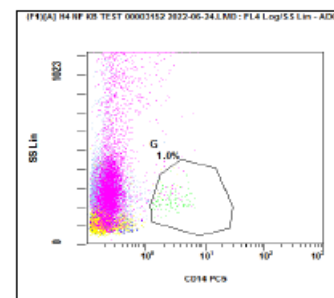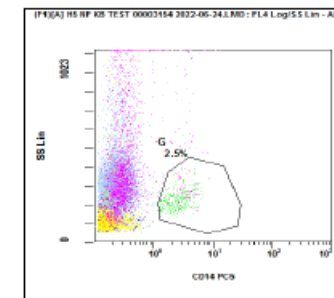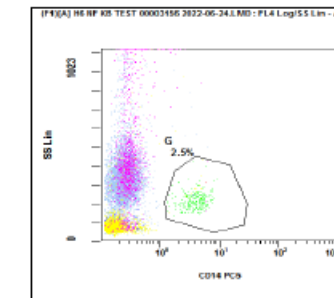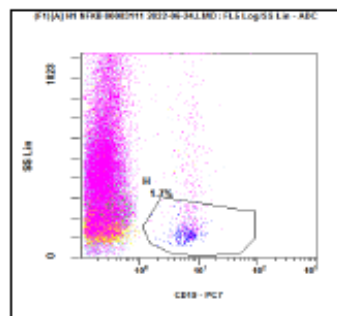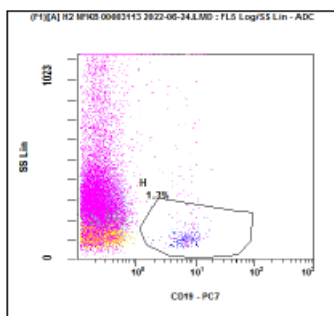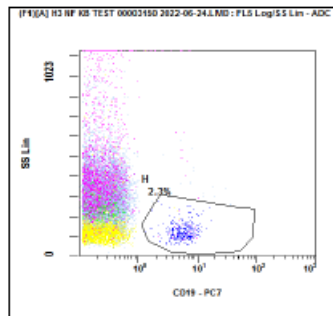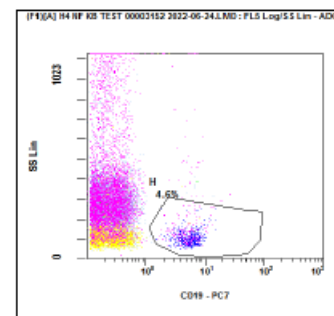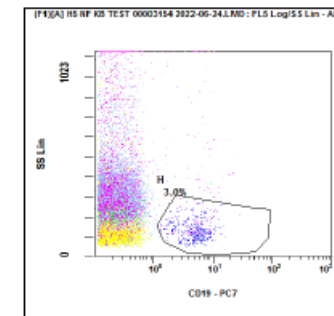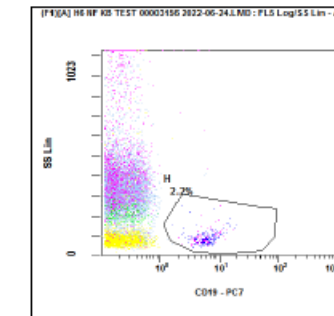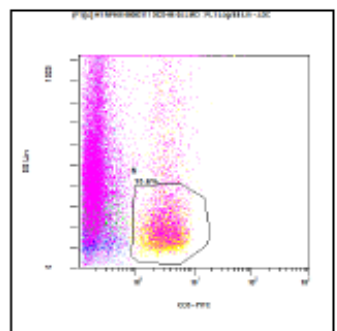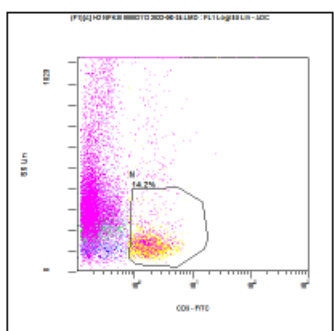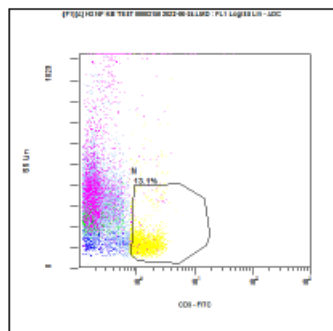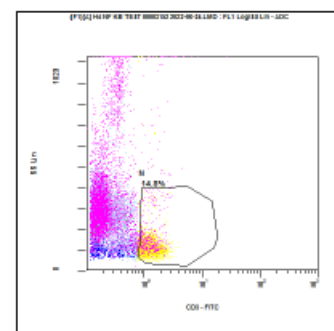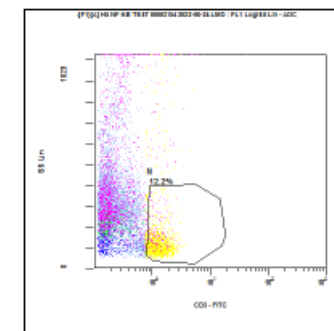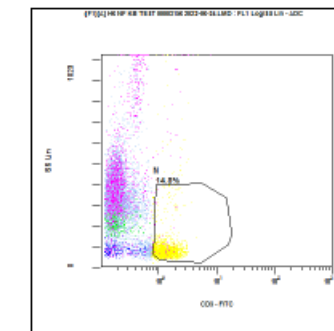

HEALTHY

7

8

9

10

11

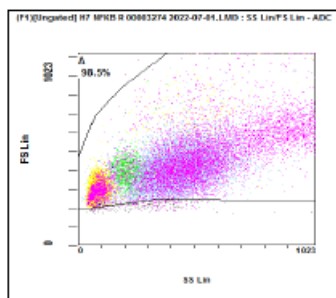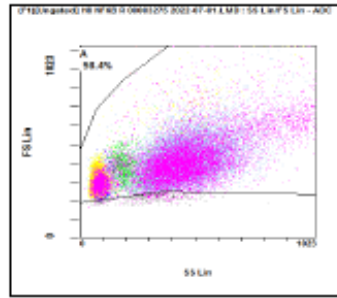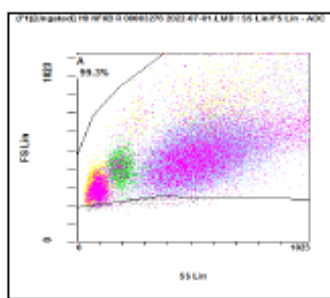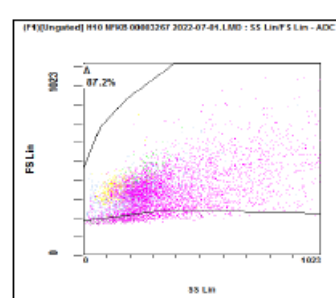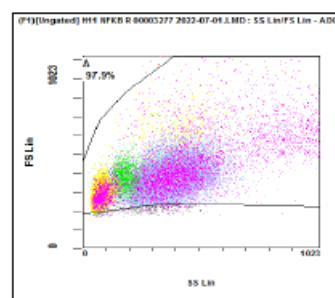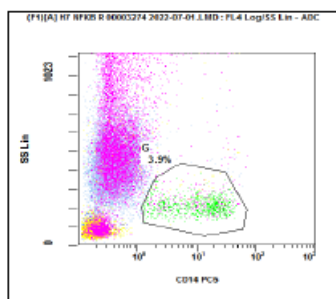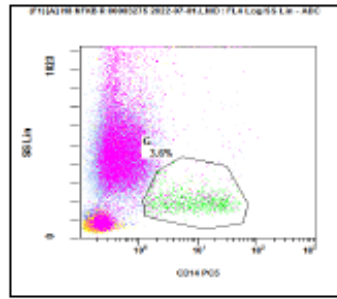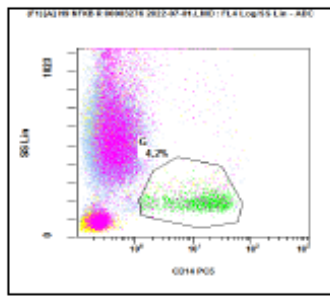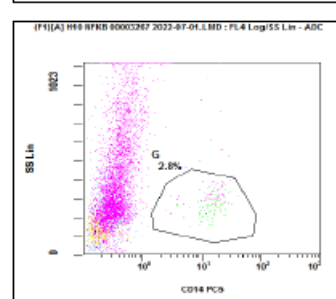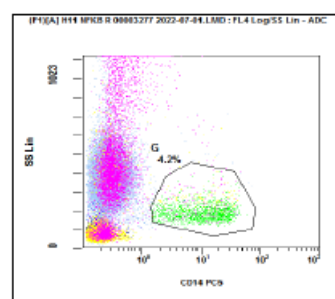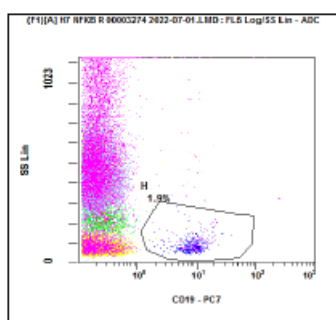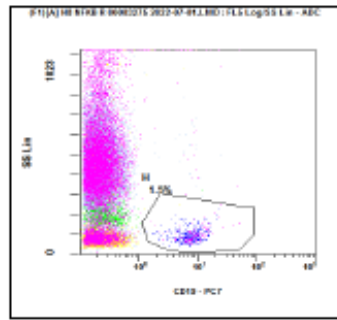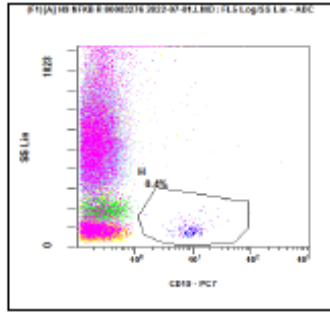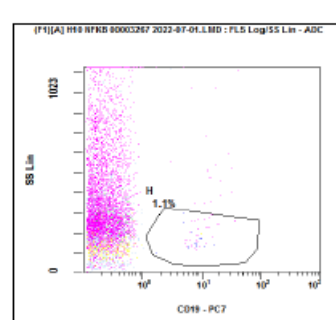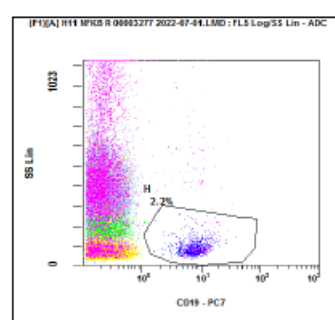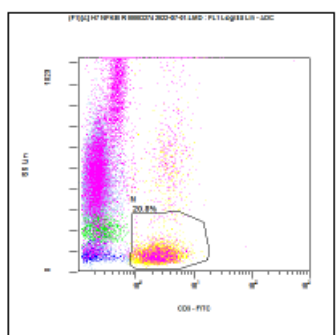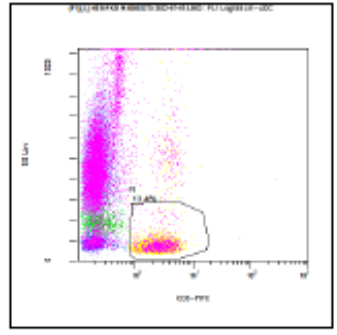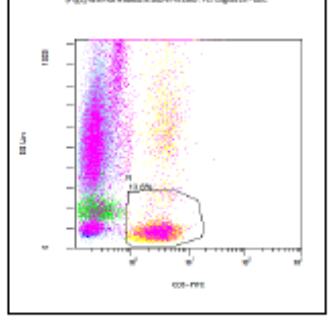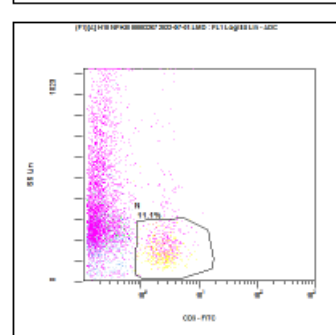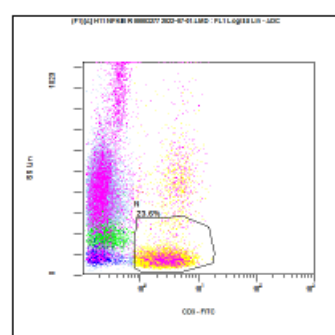

1

2

3

4

5

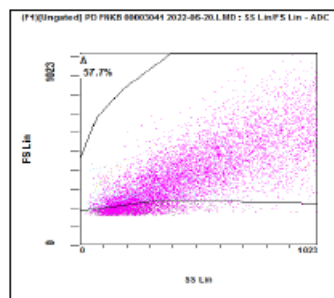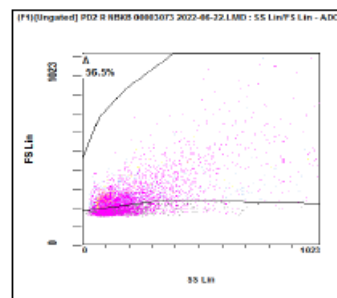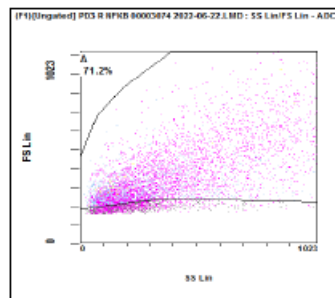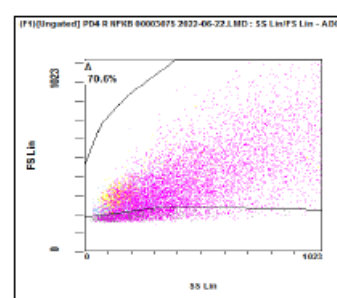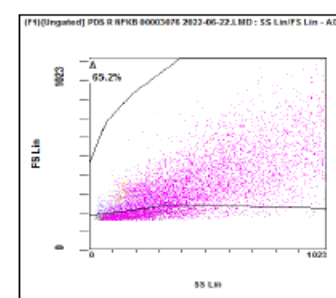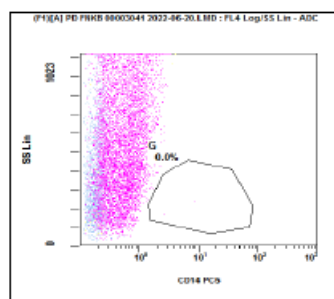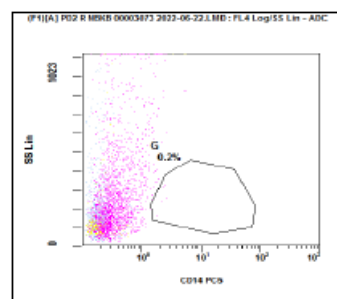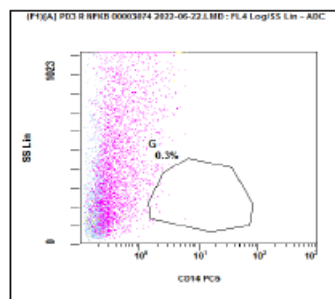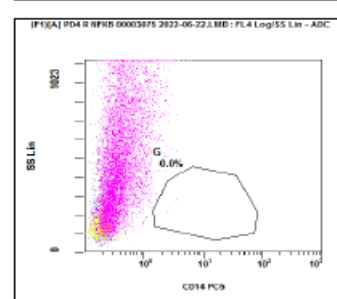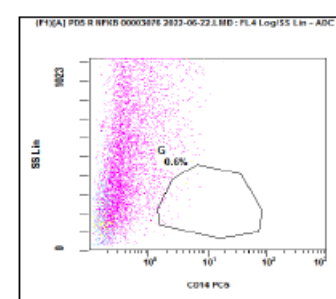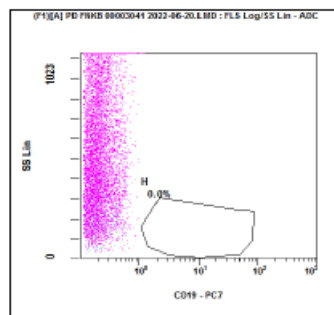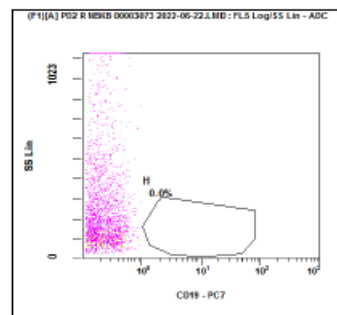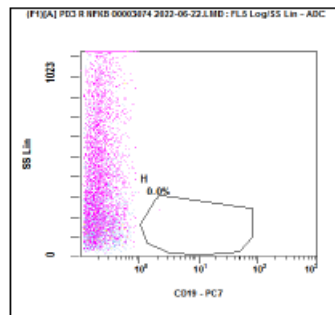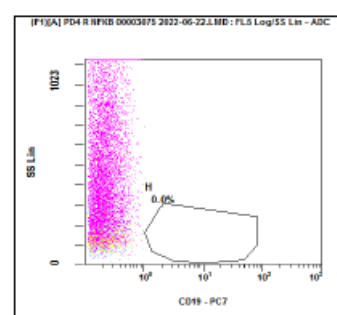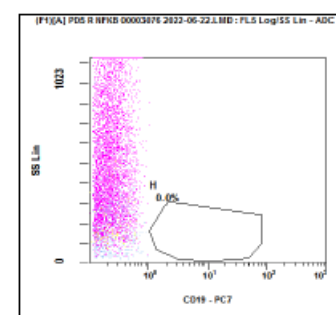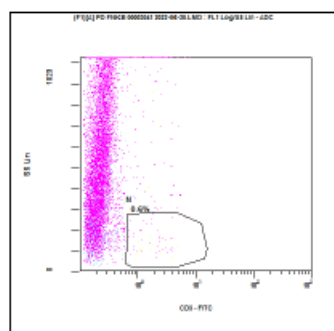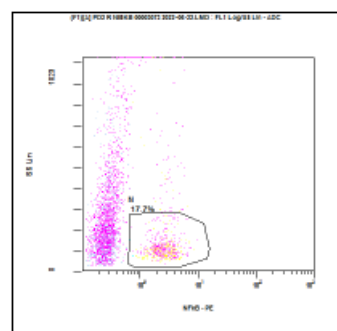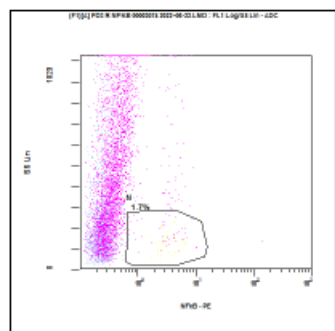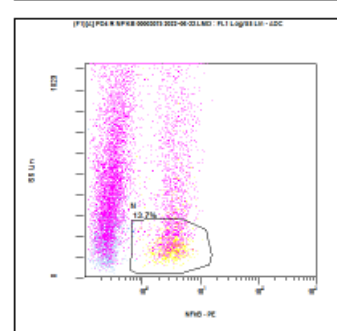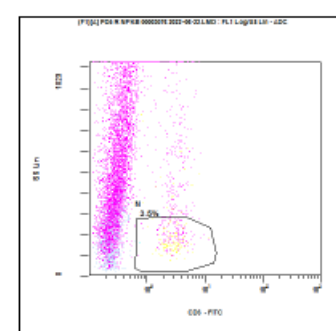



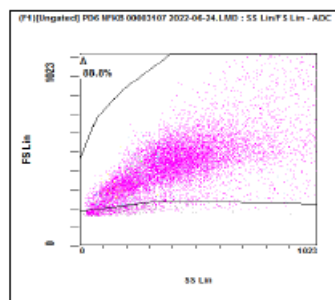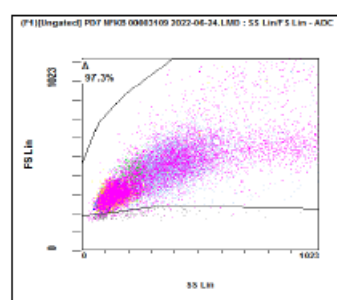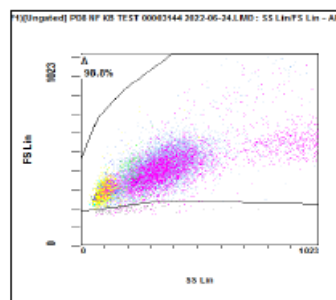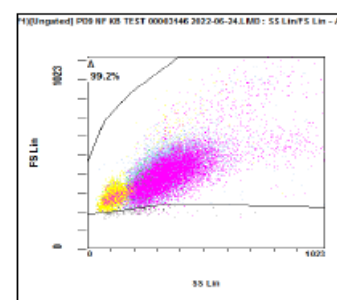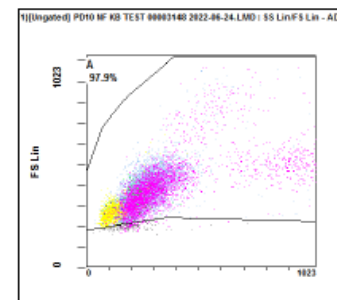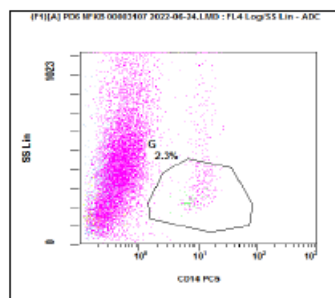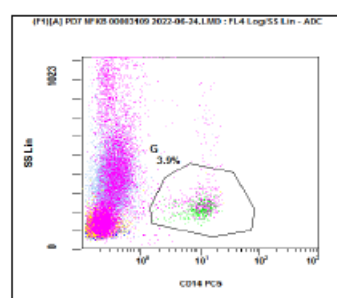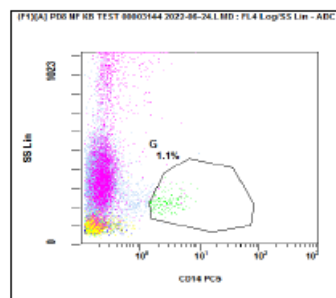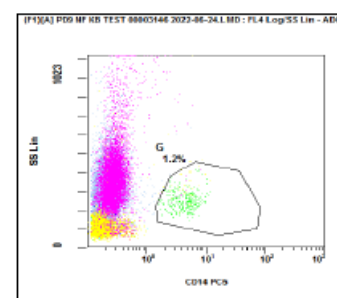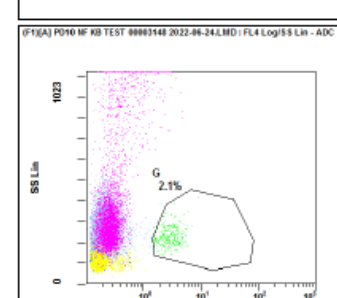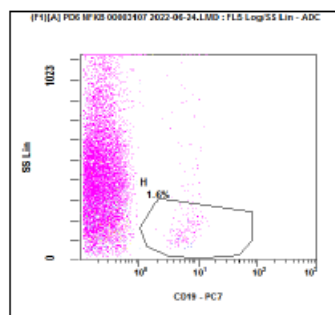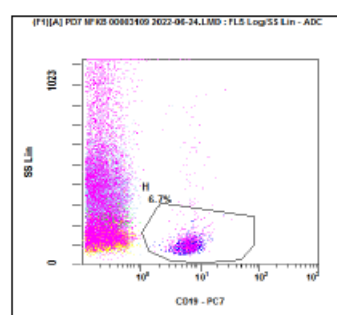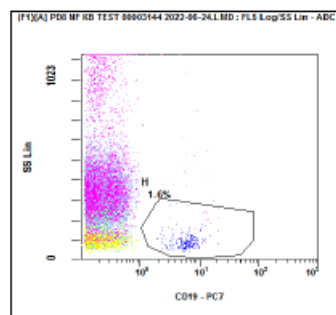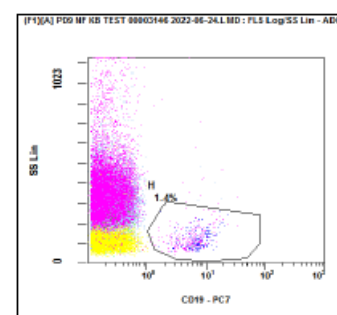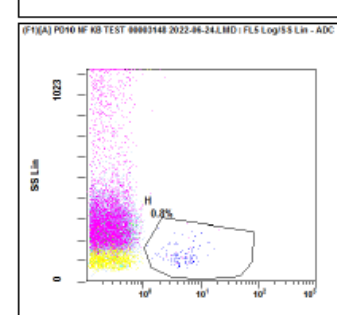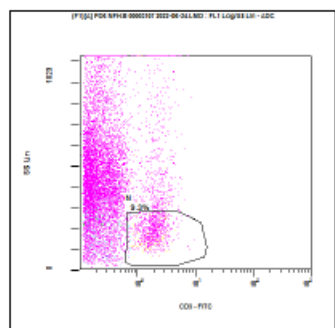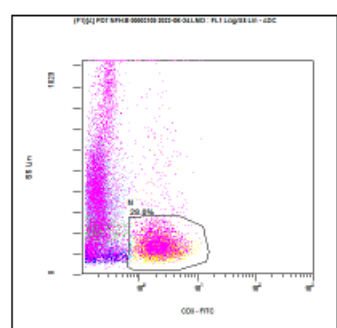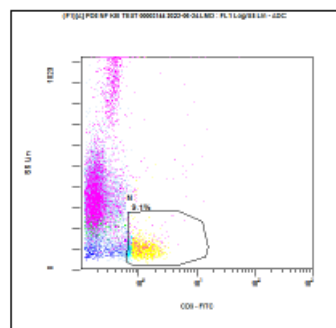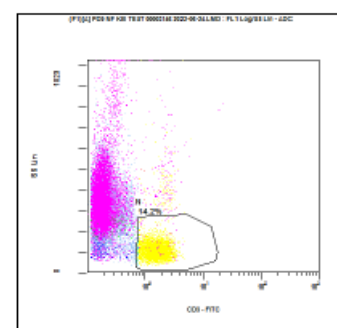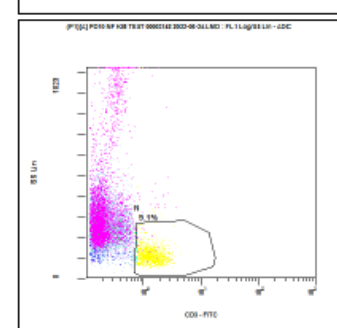

**Supplementary Figure 1.** Gating strategy for the peripheral blood immune cell population analysis. The CD3+, CD19+ and CD14+ populations are expressed as percentage of total peripheral blood cells. Data for all donors are presented

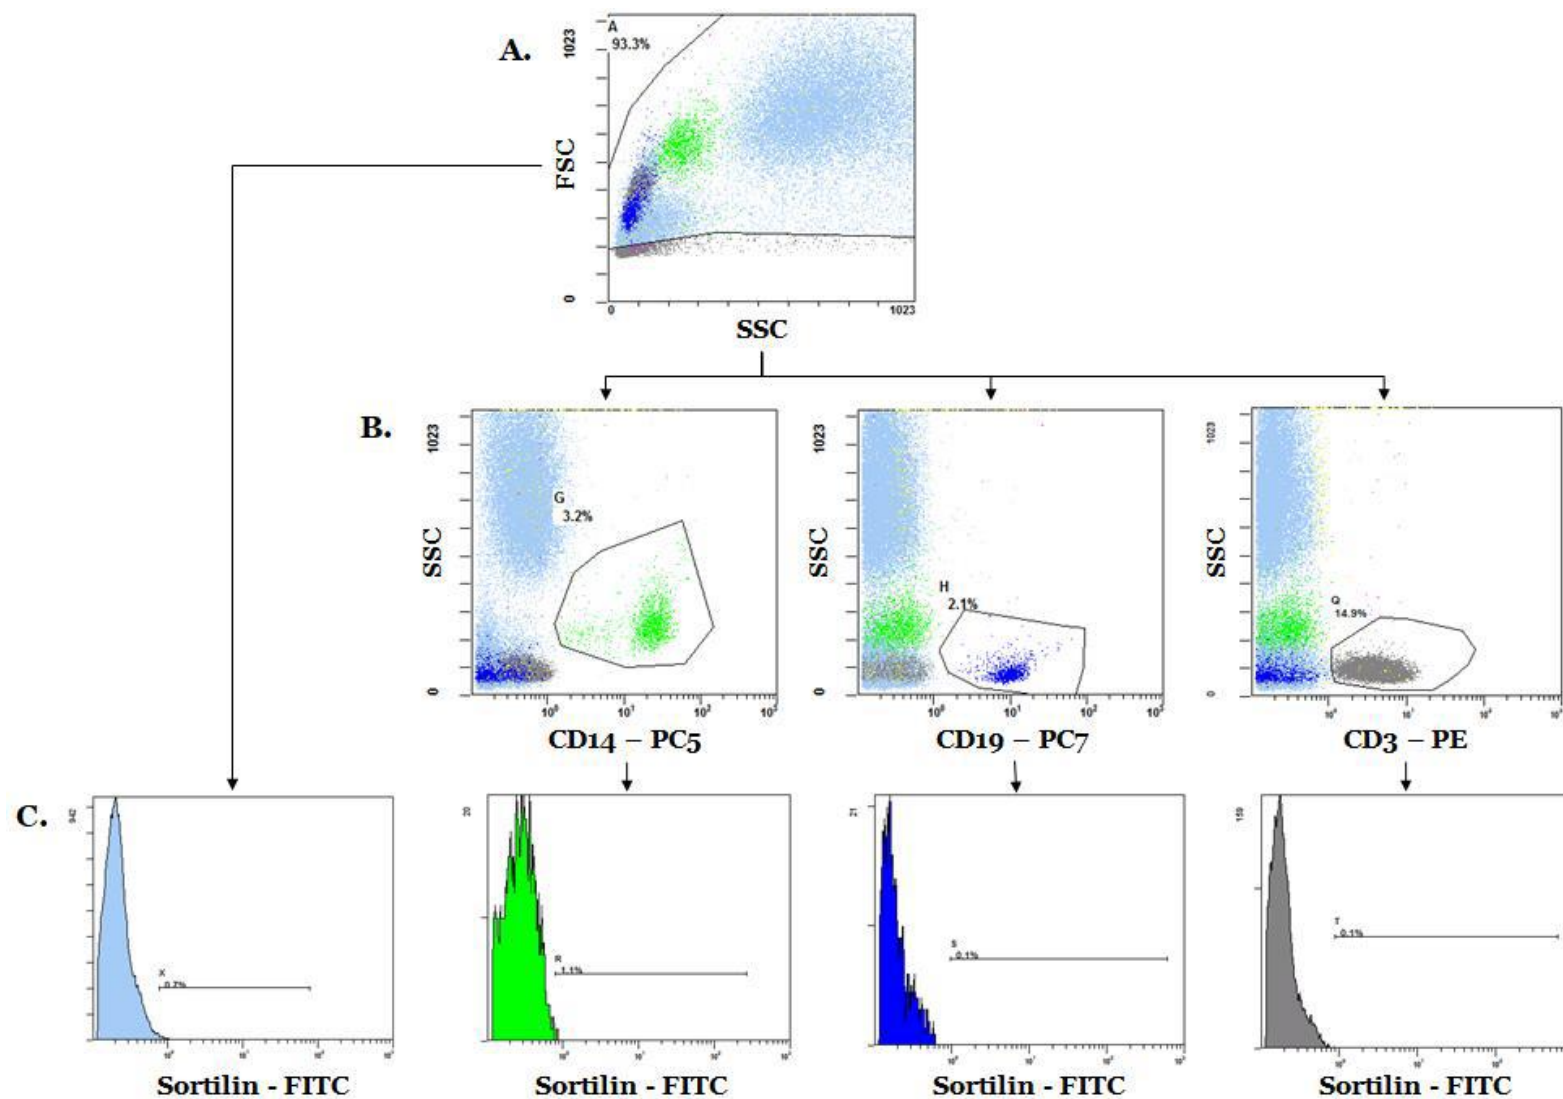

**Supplementary Figure 2.** Gating strategy for sortilin expression on the peripheral blood immune cell populations, specifically CD3+ T cells, CD19+ B cells and CD14+ Monocytes.



**Untreated**

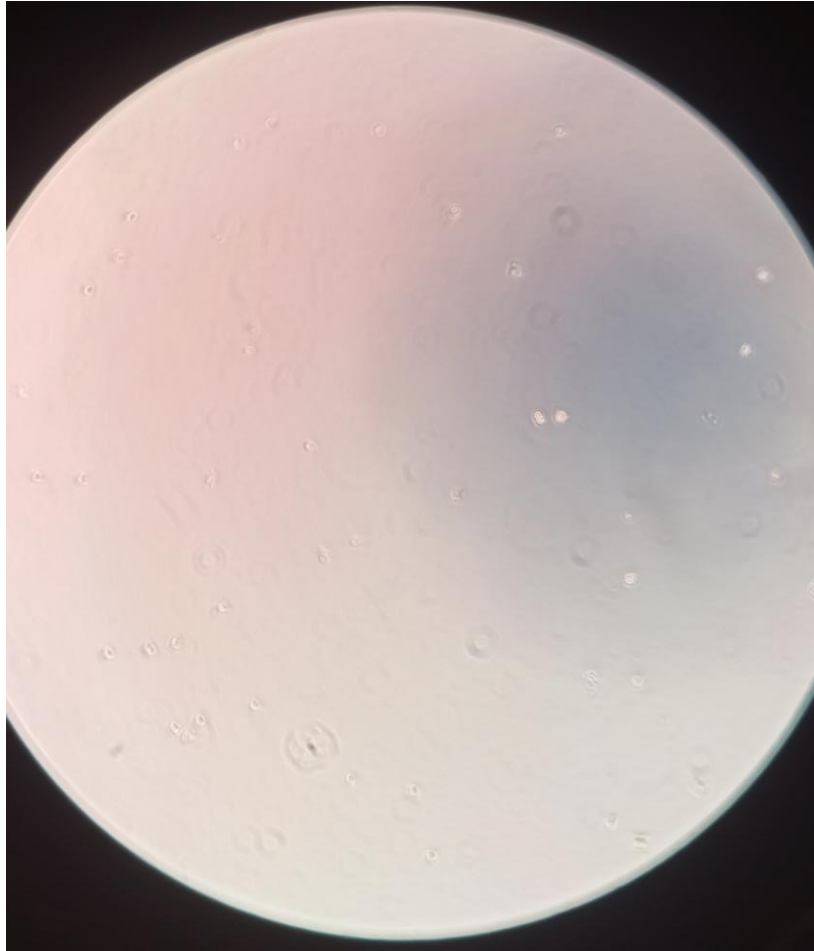

**+ox-LDL (low sortilin)**

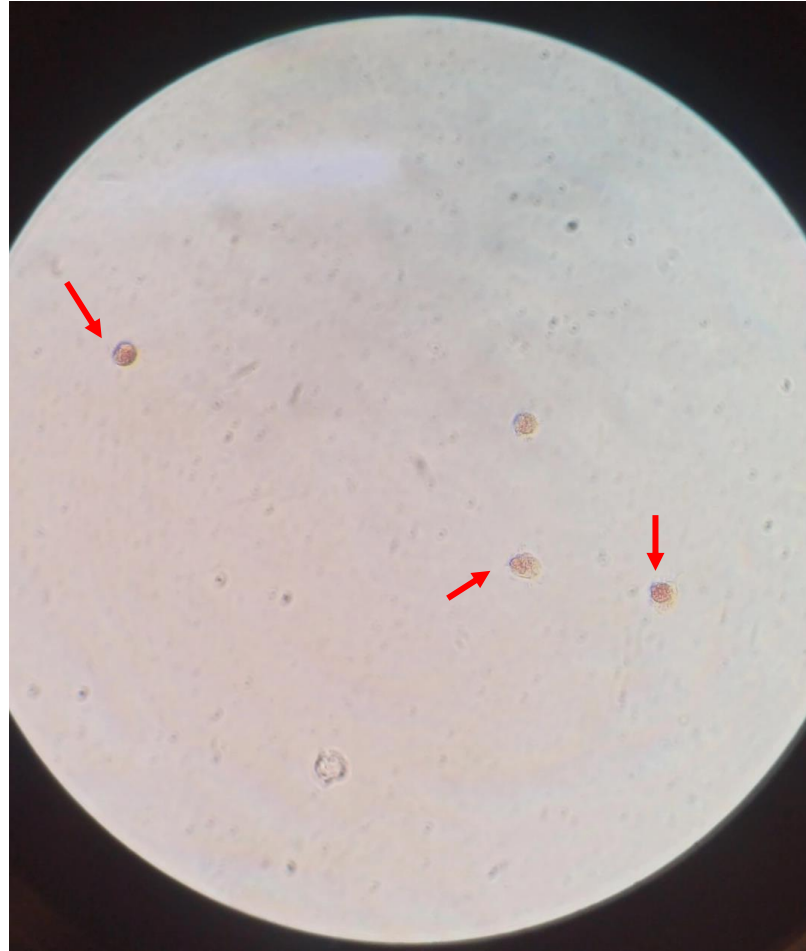

**+ox-LDL (high sortilin)**

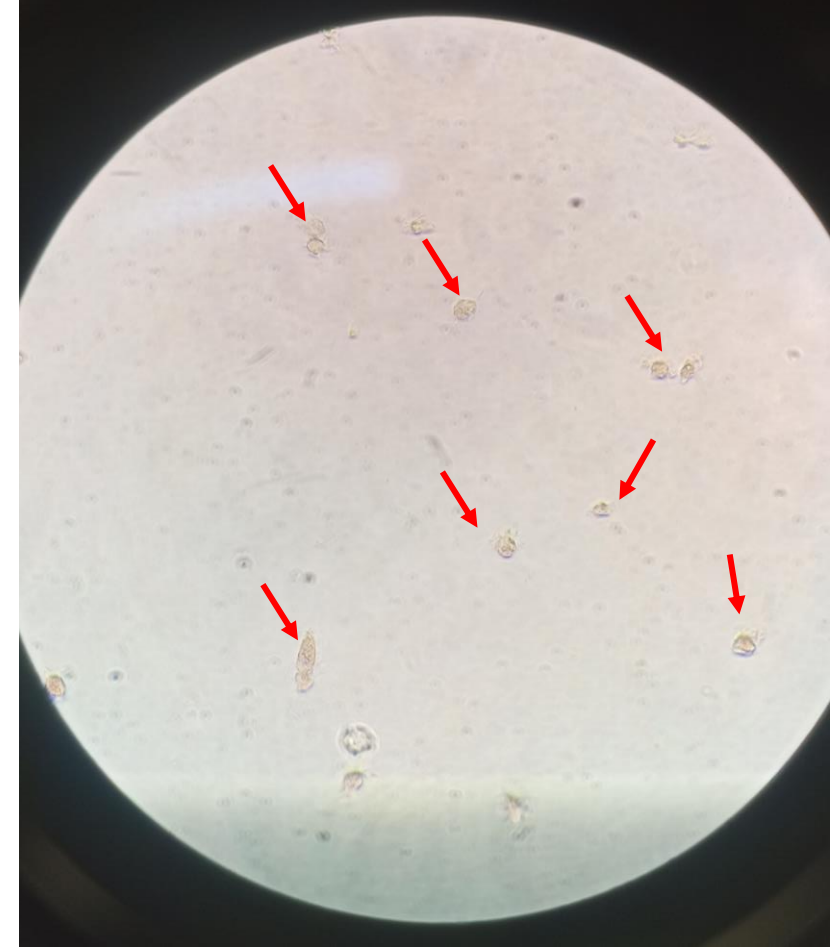

**Supplementary Figure 3.** Oxidized LDL-induced foam cell formation in human PBMC-derived macrophage cultures. Macrophage cultures were either left untreated or stimulated with 10 $\mu$ g/ml ox-LDL for 24h. Cell were stained with Oil Red O and the number of foam cells was calculated based on at least 50 cells, obtained by randomly selected fields. Images from low sortilin-expressing cells and high sortilin-expressing cells are shown. Red arrows point at foam cells.
